# Supplementary material for: In Situ pH Measurement in Microfluidic Porous Media Indicated by Surfaces Functionalized with Polyaniline (PAni)
Source: MDPI journal article supplement (doi:10.3390/colloids8010009), 2024-01-16
Supplement: s1 [file s1]

**Supplementary Materials:** The following supporting information can be downloaded at: [www.mdpi.com/xxx/s1](http://www.mdpi.com/xxx/s1), Figure S1: Fluid flow velocity and streamlines in the porous media (simulated by COMSOL 6.0); Video S1: The record of fast pH changes when acid sweeps DI water at the flow rate of 250  $\mu\text{L}/\text{min}$ ; Video S2: A coinjection test of DI water and acid at flow rate of 10  $\mu\text{L}/\text{min}$  shows a relatively steady state is achievable.

[https://drive.google.com/file/d/1HDbliqY0Sj7TtmuHq8kkdYvwr8Xa8S0W/view?usp=drive\\_link](https://drive.google.com/file/d/1HDbliqY0Sj7TtmuHq8kkdYvwr8Xa8S0W/view?usp=drive_link)

Video S1: The record of fast pH changes when acid sweeps DI water at the flow rate of 250  $\mu\text{L}/\text{min}$

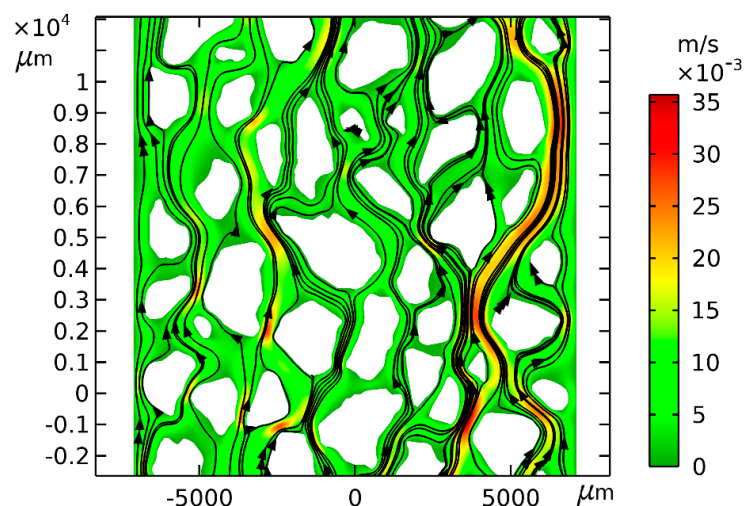

Figure S1. Fluid flow velocity and streamlines in the porous media (simulated by COMSOL 6.0)

[https://drive.google.com/file/d/1GMnp3Xgd\\_5VxR\\_4GWD7JyIDxeN0FXqc/view?usp=drive\\_link](https://drive.google.com/file/d/1GMnp3Xgd_5VxR_4GWD7JyIDxeN0FXqc/view?usp=drive_link)

Video S2: A coinjection test of DI water and acid at flow rate of 10  $\mu\text{L}/\text{min}$  shows a relatively steady state is achievable.
